# Supplementary material for: The first registration of a green liquid-phase chemiluminescence of the divalent Eu2+* ion in interaction of β-diketonate complexes Eu(acac)3·H2O, Eu(dpm)3, Eu(fod)3 and Eu(CH3COO)3·6H2O with Bui2AlH in THF with the participation of oxygen
Source: Royal Society of Chemistry journal article supplement (doi:10.1039/c5ra06400g), 2015-01-01

**SUPPLEMENTARY INFORMATION**

**The first registration of a green liquid-phase chemiluminescence of the divalent  $\text{Eu}^{2+}$  ion in interaction of  $\beta$ -diketonate complexes  $\text{Eu}(\text{acac})_3 \cdot \text{H}_2\text{O}$ ,  $\text{Eu}(\text{dpm})_3$ ,  $\text{Eu}(\text{fod})_3$  and  $\text{Eu}(\text{CH}_3\text{COO})_3 \cdot 6\text{H}_2\text{O}$  with  $\text{Bu}^i_2\text{AlH}$  in THF with the participation of oxygen**

Ramil G. Bulgakov, Svetlana M. Eliseeva and Dim I. Galimov

## Experimental section:

The  $\beta$ -diketonate complexes  $\text{Eu}(\text{acac})_3 \cdot \text{H}_2\text{O}$ ,  $\text{Eu}(\text{dpm})_3$ ,  $\text{Eu}(\text{fod})_3$ , and hexahydrate  $\text{Eu}(\text{CH}_3\text{COO})_3 \cdot 6\text{H}_2\text{O}$  were used as received from Aldrich Chemical Co. Dialkylhydride  $\text{Bu}^i_2\text{AlH}$ , 73% solution in toluene was distilled according to <sup>51</sup>. THF was distilled under argon from sodium benzophenone ketyl before use. Argon and air were purified as in <sup>51</sup>. The CL, PL spectra and decay lifetimes were recorded on a Horiba Jobin Yvon Fluorolog-3 spectrofluorometer (model FL-3-22) equipped with double-grating monochromators, dual lamphousing with 450W Xenon lamp and pulsed solid state laser-diode NanoLED, photomultiplier tube detector (Hamamatsu R928 PMT). Emission and excitation spectra were corrected for source intensity (lamp and grating) and emission spectral response (detector and grating) by standard instrument correction, provided in the instrument software. Lifetime measurements were carried out using for excitation the Xenon flash lamp (500 Hz repetition rate) in the case of  $\text{Eu}^{3+}$  and 370 nm NanoLED (1 MHz repetition rate) in the case of  $\text{Eu}^{2+}$ . PL quantum yields ( $\phi_{\text{PL}}$ ) of the  $\text{Eu}^{2+}$  complexes in THF were determined by ratio value of integrated area under corrected luminescence spectra with using  $2.0 \cdot 10^{-5}$  M solution of anthracene (scintillation pure grade) in EtOH as a reference sample ( $\phi_{\text{PL}} = 0.28$ ).<sup>52</sup> As a result, the PL quantum yields were calculated by Eq.1.

$$\frac{\phi_x}{\phi_{st}} = \frac{A_{st} \cdot n_x^2 \cdot D_x}{A_x \cdot n_{st}^2 \cdot D_{st}} \quad (1)$$

where  $\phi_{st}$  and  $\phi_x$  are the PL quantum yields of the sample and standard;  $A_x$  and  $A_{st}$  are absorbances at the excitation wavelength for the sample and standard;  $n_x$  and  $n_{st}$  are the refractive indexes of solvents: 1.4050 for THF and 1.3611 for EtOH;<sup>53</sup>  $D_x$  and  $D_{st}$  are the areas under the PL spectra of the sample and standard. CL quantum yields (in Einstein $\cdot\text{mol}^{-1}$ ) were calculated based on the ratio  $S/[\text{Me}_2\text{CHC}(\text{H})=\text{O}]$ , where  $S$  is a light sum (in photon $\cdot\text{mL}^{-1}$ ), defined as the integrated area under the CL kinetic curves in coordinates CL intensity ( $I_{\text{CL}}$ , in photon $\cdot\text{s}^{-1}\cdot\text{mL}^{-1}$ ) versus time (s),  $[\text{Me}_2\text{CHC}(\text{H})=\text{O}] \approx 4 \cdot 10^{-4}$  M is a concentration of isobutyric aldehyde, which is formed by complete oxidation of  $\text{Bu}^i_2\text{AlH}$  by oxygen and calculated using data.<sup>54</sup>

The kinetics of  $\text{Eu}^{3+} \rightarrow \text{Eu}^{2+}$  reduction was monitored by an increase in the PL intensity of  $\text{Eu}^{2+}$  at 560 nm ( $\lambda_{\text{exc}} = 445$  nm) with an instrument Fluorolog-3 spectrofluorimeter using a time mode «Kinetics Acquisition». The integration time for all experiments was 10 s. The kinetics of CL was carried out in the original chemiluminometer<sup>54</sup> in cylindrical Pyrex CL-cell (reactor) closed with a penicillin cap. As a light detector was photomultiplier tube "FEU-39". Calibration of the chemiluminometer was carried out as in <sup>55</sup>.

In a typical experiment, transparent the CL-cell was charged with  $\text{Eu}^{3+}$  complex (0.02 mmol), purged with argon for 20 min for removal of  $\text{O}_2$  from the gas space, and then 2 ml freshly distilled THF, saturated by air at stirring, was injected by syringe. After that, avoiding falling into the chemiluminescent chamber light of day,  $\text{Bu}^i_2\text{AlH}$  (0.2 mL, 0.8 mmol) was injected by syringe through the penicillin stopper with continuous stirring. In separate experiments, gaseous products ( $\text{Bu}^i\text{H}$  and  $\text{H}_2$ ) contained in the reaction solution and the gaseous phase above that were analyzed by GLC according to <sup>51,52</sup>. To explore the possibility of CL generating under anaerobic conditions, the reaction was carried out in a quartz reactor made up with two

cylindrical ampoule-like parts where the solutions of  $\text{Eu}(\text{fod})_3$  and  $\text{Bu}^i_2\text{AlH}$  were placed. The solutions were mixed after oxygen degassing by three freeze–evacuate–thaw cycles at 300 K in a CL chamber. Isolation of  $\text{Eu}^{2+}$  complex from the yellow-green reaction solution was effected according to the modified method of <sup>56</sup> by removing excess THF solvent with vacuum (1 torr) and heating (75°C). At achievement of this temperature, THF was completely removed with formation of the orange precipitate and small volume of liquid (excess  $\text{Bu}^i_2\text{AlH}$  and its oxidation products). Then, reactor was cooled under argon and 2 ml of hexane was added to remove excess  $\text{Bu}^i_2\text{AlH}$  and its conversion products. This operation was performed 5 times. As a result, dark yellow  $\text{Eu}^{2+}$  complexes were isolated. The molecular formulas of the resulting  $\text{Eu}^{2+}$  complexes were determined using complexometric titration, elemental analysis, and IR spectroscopy. The UV-visible absorption spectra were recorded by spectrophotometer Perkin Elmer Lambda 750 instrument in argon atmosphere using 1 cm quartz cells fitted with hermetic stoppers.

IR spectra were recorded in solid state (KBr tablet) using «Bruker Vertex 70V» instrument. Elemental analysis of  $\text{Eu}^{2+}$  complexes were performed in the elemental analyzer CHNS with an error:  $\pm 0.3\%$ .

Spectral and other characteristics of the complexes obtained are presented below.

**$\text{Eu}(\text{fod})_2 \cdot (\text{THF})_2$ .** Yield (19.2 mg, 44.8 %) Found (%): Eu, 17.7; F, 31.2; C, 37.8; H, 4.2; O, 9.1. Calculated for  $\text{EuC}_{28}\text{H}_{36}\text{F}_{14}\text{O}_6$  (%): Eu, 17.2; F, 30.0; C, 37.9; H, 4.1; O, 10.80. IR absorptions (KBr),  $\nu_{\text{max}}/\text{cm}^{-1}$ : 840 (C-O, THF), 1034 (C-O, THF), 1228 (C-F), 1380-1425 ( $-\text{C}(\text{CH}_3)_3$ ), 1460 ( $-\text{CH}_2-$ ), 1702 ( $-\text{CH}_2-$ ,  $-\text{CH}_3$ ), 1735 (C=O), 1804 ( $-\text{CF}_2-\text{CH}-\text{C}=\text{O}$ ).

**$\text{Eu}(\text{dpm})_2 \cdot (\text{THF})_2$ .** Yield (15.3 mg, 31.3 %) Found (%): Eu, 22.9; C, 54.3; H, 8.7; O, 14.1. Calculated for  $\text{EuC}_{30}\text{H}_{54}\text{O}_6$  (%): Eu, 23.0; C, 54.4; H, 8.1; O, 14.5. IR absorptions (KBr),  $\nu_{\text{max}}/\text{cm}^{-1}$ : 798 (C-O, THF), 1029 (C-O, THF), 1406 ( $-\text{CH}_2-$ ), 1467 ( $-\text{CH}_2-$ ), 1528 ( $-\text{CH}=\text{}$ ), 1745 (C=O), 2873 ( $-\text{CH}_2-$ ), 2929 ( $-\text{CH}_2-$ ), 2959 ( $-\text{CH}=\text{}$ ).

**$\text{Eu}(\text{acac})_2 \cdot (\text{THF})_2$ .** Yield (4.1 mg, 16.4 %) Found (%): Eu, 30.7; C, 43.6; H, 6.5; O - 19.2. Calculated for  $\text{EuC}_{18}\text{H}_{30}\text{O}_6$  (%): Eu, 30.8; C, 43.7; H, 6.1; O, 19.4. IR absorptions (KBr),  $\nu_{\text{max}}/\text{cm}^{-1}$ : 797 (C-O, THF), 1026 (C-O, THF), 1386 ( $-\text{CH}_2-$ ), 1461 ( $-\text{CH}_3$ ), 1528 ( $-\text{CH}$ ), 1745 (C=O), 2855 ( $-\text{CH}_2-$ ), 2925 ( $\text{CH}_3$ ), 2956 ( $-\text{CH}=\text{}$ ).

**$\text{Eu}(\text{CH}_3\text{COO})_2 \cdot (\text{THF})_2$ .** Yield (6.3 mg, 39.9 %) Found (%): Eu, 36.9; C, 35.1; H, 5.6; O, 22.4. Calculated for  $\text{EuC}_{12}\text{H}_{22}\text{O}_6$  (%): Eu, 36.7; C, 34.8; H, 5.3; O, 23.2. IR absorptions (KBr),  $\nu_{\text{max}}/\text{cm}^{-1}$ : 789 (C-O, THF), 1030 (C-O, THF), 1386 ( $-\text{CH}_2-$ ), 1423 ( $\text{CH}_2$ ), 1745 (C=O), 2855 ( $-\text{CH}_2-$ ), 2925 ( $-\text{CH}_3$ ).

- S1. R. G. Bulgakov; S.P. Kuleshov; A.N. Zuzlov, I.R. Mullagaleev, L.M. Khalilov, U.M. Dzhemilev, *J. Organometall. Chem.*, 2001, **636**, 56-62.
- S2. K. Suzuki, A. Kobayashi, S. Kaneko, K. Takehira, T. Yoshihara, H. Ishida, Y. Shiina, S. Oishic and S. Tobita, *Phys. Chem. Chem. Phys.*, 2009, **11**, 9850-9860.
- S3. A. J. Gordon, R. A. Ford, *The Chemist's companion*, John Wiley and sons, New York-London-Sydney-Toronto, 1972.
- S4. R. G. Bulgakov, V. P. Kazakov, G. A. Tolstikov, *Chemiluminescence of Organometallic Compounds*, Nauka, Moscow, 1989.
- S5. R.G. Bulgakov, S.M. Eliseeva, D.I. Galimov, *J. Lumin.*, 2013, **136**, 95-99.

- S6. R. G. Bulgakov, S. M. Eliseeva, D.I. Galimov, *Russ. Chem. Bull., Int. Ed.*, 2013, **62**, 2345-2348.

Figure S1. PL spectra of isolated complexes  $\text{EuL}_2 \cdot (\text{THF})_2$  in  $\text{CHCl}_3\text{-CDCl}_3$  (after NMR measurements). 1 –  $\text{Eu}(\text{acac})_2 \cdot (\text{THF})_2$ ,  $4.84 \cdot 10^{-4}$  M; 2 –  $\text{Eu}(\text{CH}_3\text{COO})_2 \cdot (\text{THF})_2$ ,  $2.64 \cdot 10^{-4}$  M; 3 –  $\text{Eu}(\text{dpm})_2 \cdot (\text{THF})_2$ ,  $3.5 \cdot 10^{-5}$  M.

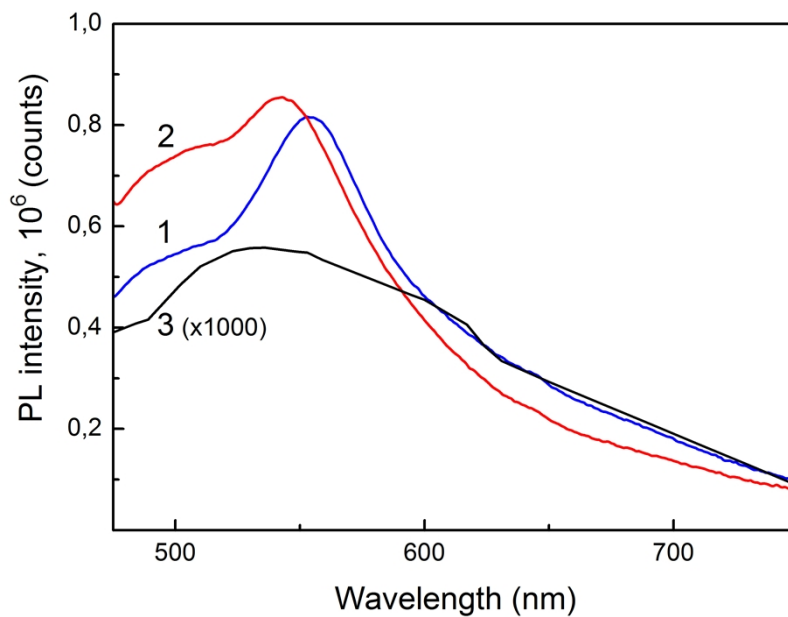

Figure S2. CL kinetics of BGCL (1) and at interaction in system  $\text{Eu}(\text{acac})_3 \cdot \text{H}_2\text{O} \cdot \text{THF} \cdot \text{Bu}_3\text{Al} \cdot \text{O}_2$  at 300 K (2). CL were measured with chemiluminometer.  $[\text{Eu}^{3+}]_0 = 1 \cdot 10^{-2}$  M,  $[\text{Bu}_3\text{Al}]_0 = 4 \cdot 10^{-1}$  M,  $V(\text{THF}) = 2.0$  mL.

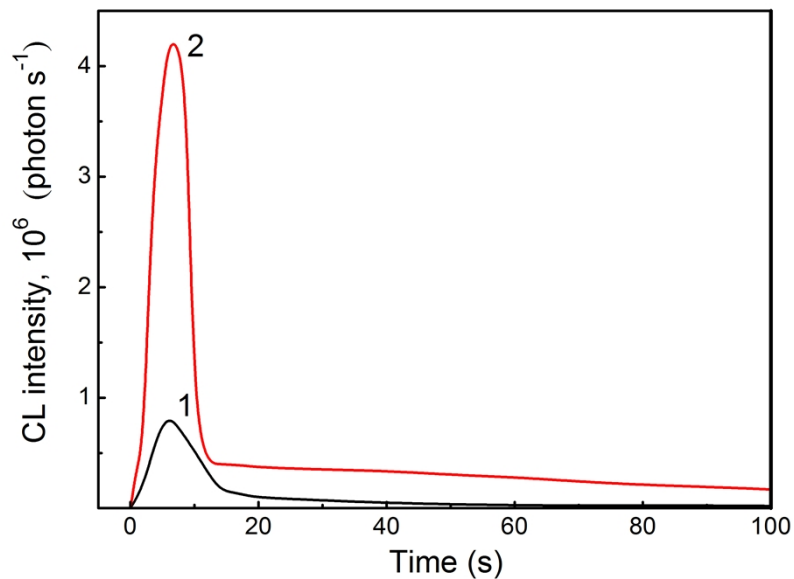

Figure S3. PL(1) and CL (2) spectra of solutions in reaction of the  $\text{Eu}(\text{acac})_3 \cdot \text{H}_2\text{O}$  and  $\text{Bu}^i_3\text{Al}$  in THF at 300 K.  $[\text{Eu}(\text{acac})_3 \cdot \text{H}_2\text{O}]_0 = 10^{-2}$  M,  $[\text{Bu}^i_3\text{Al}]_0 = 4 \cdot 10^{-1}$  M,  $V(\text{THF}) = 2$  ml.

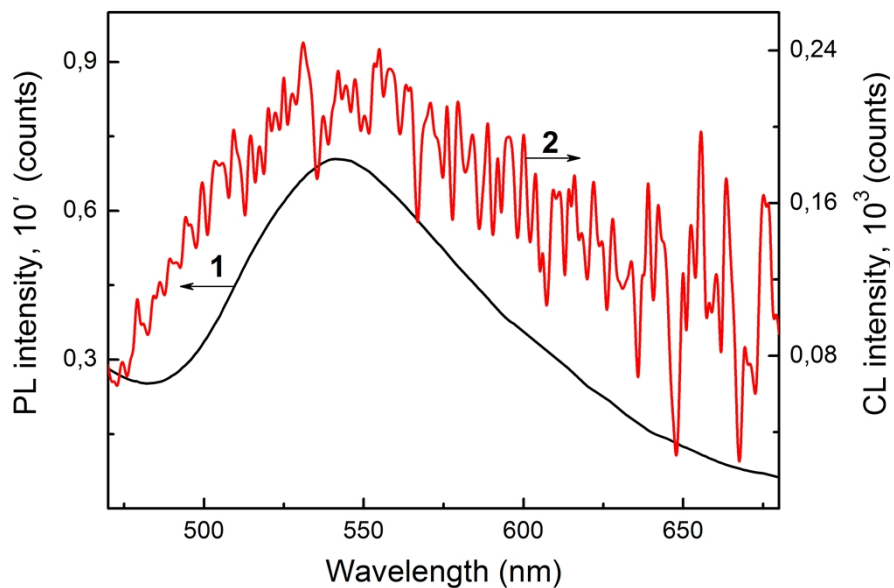

Figure S4. Reduction kinetics of  $\text{Eu}^{3+}$  to  $\text{Eu}^{2+}$  in the reaction  $\text{Eu}(\text{acac})_3 \cdot \text{H}_2\text{O}$  and  $\text{Bu}^i_3\text{Al}$  in THF.  $[\text{Eu}(\text{acac})_3 \cdot \text{H}_2\text{O}]_0 = 10^{-2}$  M,  $[\text{Bu}^i_3\text{Al}]_0 = 4 \cdot 10^{-1}$  M,  $V(\text{THF}) = 2$  ml.

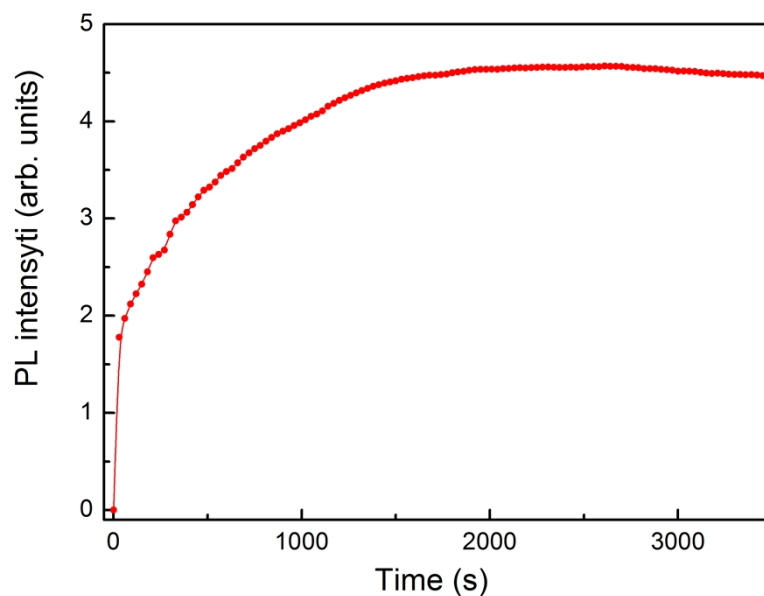

Figure S5. Spectral overlap of the absorption spectra (red line) of the  $\text{Eu}^{2+}$  ion ( $10^{-2}$  M) and phosphorescence spectrum (black line) of isobutyric aldehyde  $^3\text{Pr}^i\text{C}(\text{H})=\text{O}^*$  ( $5 \cdot 10^{-4}$  M). 1-4 – absorption spectra of the reaction solutions, obtained after interaction of  $\text{Bu}^i_2\text{AlH}$  with  $\text{Eu}(\text{CH}_3\text{COO})_3 \cdot 6\text{H}_2\text{O}$  (1),  $\text{Eu}(\text{acac})_3 \cdot \text{H}_2\text{O}$  (2),  $\text{Eu}(\text{dpm})_3$  (3), and  $\text{Eu}(\text{fod})_3$  (4) in THF; 5 – phosphorescence spectrum of isobutyric aldehyde  $^3\text{Pr}^i\text{C}(\text{H})=\text{O}^*$  ( $5 \cdot 10^{-4}$  M) in THF at 77 K. 6 – BGCL spectrum.  $[\text{Bu}^i_2\text{AlH}]_0 = 4 \cdot 10^{-1}$  M,  $V(\text{THF}) = 2.0$  mL,  $T = 300$  K.

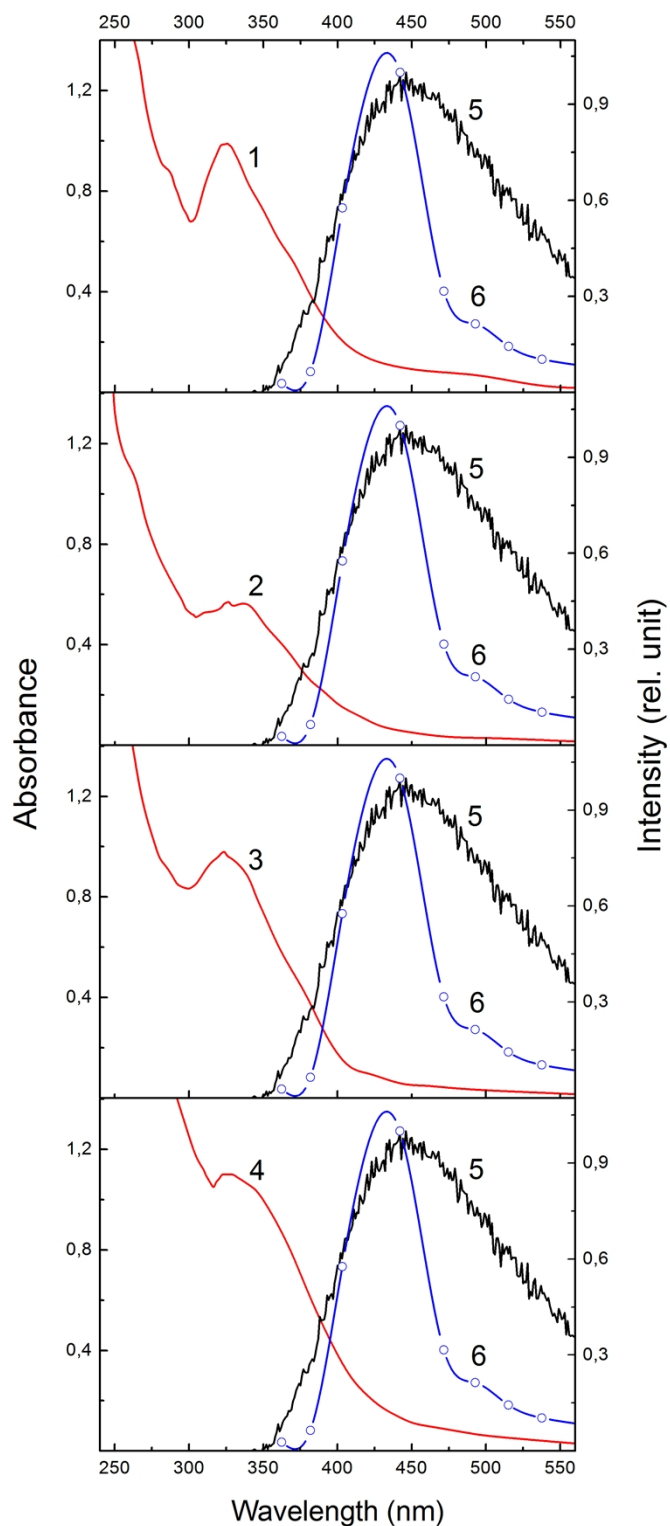

Figure S6. Energy level diagram of enhanced green CL due to energy transfer from triplet excited isobutyric aldehyde  ${}^3\text{Pr}^i\text{C}(\text{H})=\text{O}^*$  to the  $\text{Eu}^{2+}$  ion.

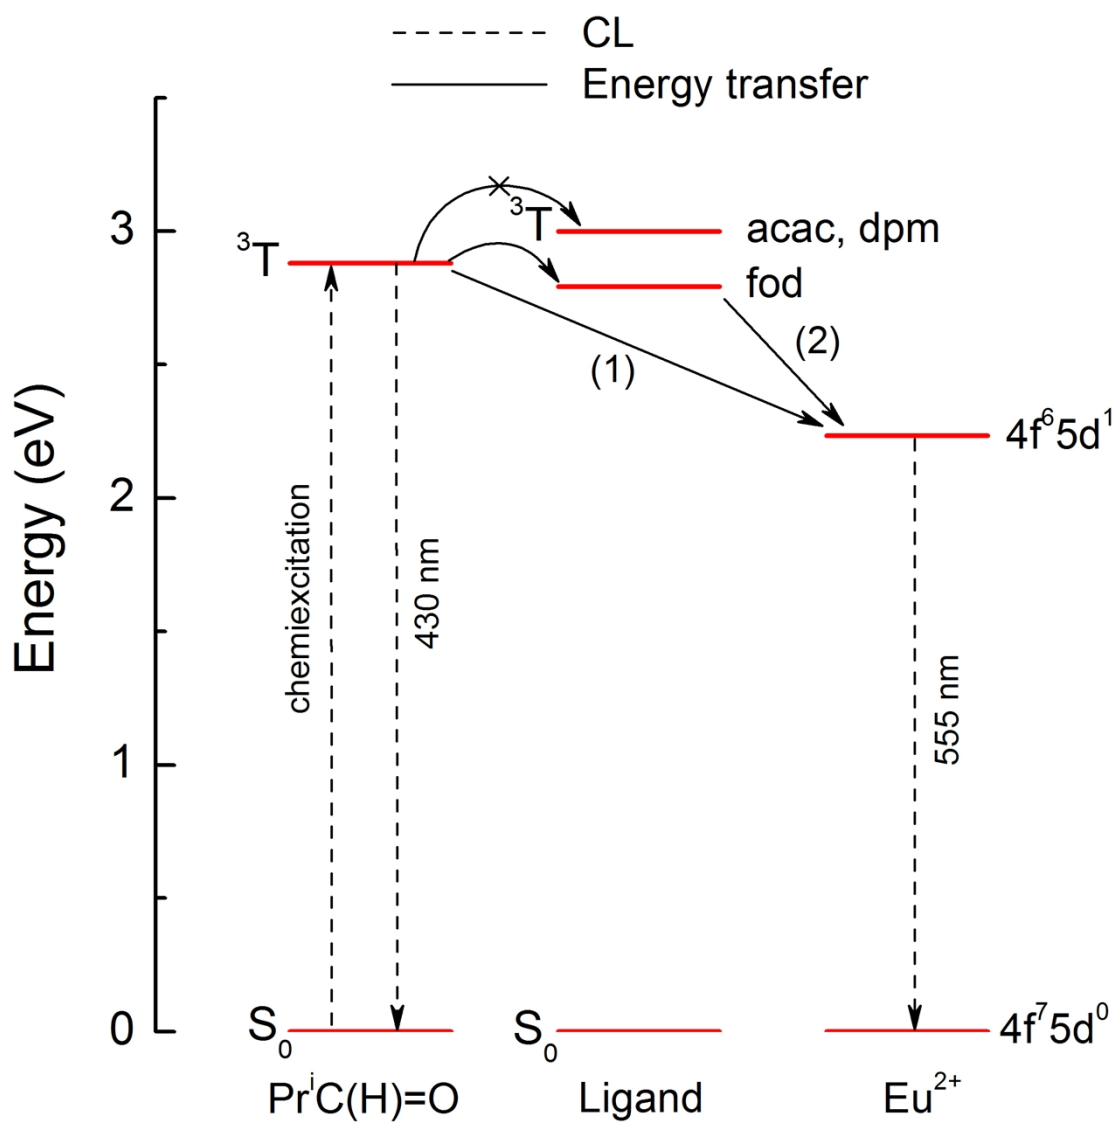

Supplement: c5ra06400g1.pdf [file c5ra06400g1.pdf]
